# Supplementary material for: Supramolecular chemistry of fluoroanions: selectivity in weak interactions
Source: Royal Society of Chemistry journal article supplement (doi:10.1039/b906160f), 2009-01-01
Supplement: b906160f.pdf [file b906160f.pdf]

**Supplementary information:***Experimental Section*

General methods: The syntheses of **2** and **3** were performed in Schlenk-type flasks under dry nitrogen. Solvents were dried by conventional methods and distilled immediately prior to use. CDCl<sub>3</sub> was passed down a 5 cm-thick alumina column and stored under nitrogen over molecular sieves (4 Å). Routine <sup>1</sup>H, <sup>13</sup>C{<sup>1</sup>H}, <sup>19</sup>F{<sup>1</sup>H} and <sup>31</sup>P{<sup>1</sup>H} NMR spectra were recorded on a FT Bruker AVANCE 300 (<sup>1</sup>H: 300.1 MHz, <sup>13</sup>C: 75.5 MHz, <sup>19</sup>F: 282.4 MHz, <sup>31</sup>P: 121.5 MHz) instrument at 25°C. <sup>1</sup>H NMR spectral data were referenced to residual CHCl<sub>3</sub> [7.26 ppm], <sup>13</sup>C chemical shifts are reported relative to CDCl<sub>3</sub> [77.0 ppm], and the <sup>31</sup>P NMR data are given relative to external H<sub>3</sub>PO<sub>4</sub>. The <sup>19</sup>F spectra were measured relative to neat CFCl<sub>3</sub>. Elemental analyses were performed by the Service de Microanalyse, Institut de Chimie (CNRS), Strasbourg. The diphosphite **L** (having *S,S* stereochemistry) and complex **1** were prepared according to reported procedures.<sup>15</sup> For convenience, spectroscopic data for **1** are also given below.

**( $\eta^3$ -allyl)-cis-*P,P'*-{[(*S,S*)-5,11,17,23-tetra-*tert*-butyl-25,27-dipropyloxy-26,28-bis(1,1'-binaphthyl-2,2'-dioxyphosphanyloxy)calix[4]arene]}palladium(II) tetrafluoroborate dimer, **2**: A solution of (*S,S*)-5,11,17,23-tetra-*tert*-butyl-25,27-dipropyloxy-26,28-bis(1,1'-binaphthyl-2,2'-dioxyphosphanyloxy)calix[4]arene (0.110 g, 0.08 mmol) in acetone (30 mL) was slowly added to a suspension of [ $(\eta^3$ -C<sub>3</sub>H<sub>5</sub>)PdCl]<sub>2</sub> (0.014 g, 0.04 mmol) and NH<sub>4</sub>BF<sub>4</sub> (0.009 g, 0.09 mmol) in acetone (30 mL) at 0°C. The reaction mixture was stirred for 1 h at room temperature, then filtered through Celite. The solvent was evaporated and the residue was washed with hexane (10 mL) to afford the product as a pale yellow solid. Recrystallisation from CH<sub>2</sub>Cl<sub>2</sub>-hexane afforded colourless crystals (0.099 g, 78%). The <sup>1</sup>H and <sup>13</sup>C{<sup>1</sup>H} NMR spectra are essentially identical to those reported earlier for complex **1** (and given below). <sup>31</sup>P{<sup>1</sup>H} NMR (121 MHz, CDCl<sub>3</sub>):  $\delta$  128.74 and 126.67 (AB spin system,  $J_{PP'}$  = 108.4 Hz, OP(OAr)<sub>2</sub>). <sup>19</sup>F{<sup>1</sup>H} NMR (282 MHz, CDCl<sub>3</sub>):  $\delta$  -153.87 (s, BF<sub>4</sub>). Found: C 67.63, H 6.01%. Calc. For C<sub>93</sub>H<sub>95</sub>BF<sub>4</sub>O<sub>8</sub>P<sub>2</sub>Pd·1CH<sub>2</sub>Cl<sub>2</sub> ( $M_r$  = 1594.56 + 84.93): C 67.17, H 5.82%. Crystals (colourless) suitable for X-ray diffraction were obtained by slow diffusion of heptane into a CH<sub>2</sub>Cl<sub>2</sub> solution of the complex.**

**Bis{( $\eta^3$ -allyl)-*cis*-*P,P'*-{[(*S,S*)-5,11,17,23-tetra-*tert*-butyl-25,27-dipropoxy-26,28-bis(1,1'-binaphthyl-2,2'-dioxiphosphanoyloxy)calix[4]arene]}palladium(II)} 1.0 hexafluorophosphate, 1.0 tetrafluoroborate, **3**: Colourless crystals of the product, suitable for X-ray diffraction, were obtained by slow diffusion of petroleum ether into a CH<sub>2</sub>Cl<sub>2</sub> solution of a stoichiometric amount of ( $\eta^3$ -allyl)-*cis*-*P,P'*-{[(*S,S*)-5,11,17,23-tetra-*tert*-butyl-25,27-dipropoxy-26,28-bis(1,1'-binaphthyl-2,2'-dioxiphosphanoyloxy)calix[4]arene]}palladium(II) hexafluorophosphate (0.100 g, 0.06 mmol) and ( $\eta^3$ -allyl)-*cis*-*P,P'*-{[(*S,S*)-5,11,17,23-tetra-*tert*-butyl-25,27-dipropoxy-26,28-bis(1,1'-binaphthyl-2,2'-dioxiphosphanoyloxy)calix[4]arene]}palladium(II) tetrafluoroborate (0.096 g, 0.06 mmol). The <sup>1</sup>H NMR and <sup>13</sup>C{<sup>1</sup>H} NMR spectra were identical to those of complex **1**. <sup>31</sup>P{<sup>1</sup>H} NMR (121 MHz, CDCl<sub>3</sub>):  $\delta$  128.70 and 126.62 (AB spin system,  $J_{PP'} = 108.4$  Hz, OP(OAr)<sub>2</sub>), -144.38 (sept,  $J_{PF} = 712.8$  Hz, PF<sub>6</sub>). <sup>19</sup>F{<sup>1</sup>H} NMR (282 MHz, CDCl<sub>3</sub>):  $\delta$  -73.60 (d,  $J_{FP} = 712.8$  Hz, PF<sub>6</sub>), -153.91 (s, BF<sub>4</sub>). Found: C 68.66, H 5.81%. Calc. For C<sub>186</sub>H<sub>190</sub>F<sub>10</sub>O<sub>16</sub>P<sub>5</sub>BPd<sub>2</sub> ( $M_r = 1654.08$ ): C 68.74, H 5.89%. The 1:1 BF<sub>4</sub> / PF<sub>6</sub> ratio was verified on a crystalline sample of **3**.**

**X-ray crystallographic data of **3****: C<sub>186</sub>H<sub>190</sub>BF<sub>10</sub>O<sub>16</sub>P<sub>5</sub>Pd<sub>2</sub>•3CH<sub>2</sub>Cl<sub>2</sub>•1C<sub>5</sub>H<sub>12</sub>,  $M_r = 3576.76$ , monoclinic,  $P2_1$ ,  $a = 21.7830(7)$ ,  $b = 19.1953(6)$ ,  $c = 23.4584(8)\text{\AA}$ ,  $\beta = 94.962(2)$ ,  $V = 9771.9(6)\text{\AA}^3$ ,  $Z = 2$ ,  $D_c = 1.216\text{ Mg m}^{-3}$ ,  $\lambda(\text{MoK}\alpha) = 0.71073\text{\AA}$ ,  $\mu = 0.373\text{ cm}^{-1}$ ,  $F(000) = 3728$ ,  $T = 293(2)\text{ K}$ . Single crystals were obtained by slow diffusion of pentane into a CH<sub>2</sub>Cl<sub>2</sub> solution of the complex. A sample was studied on a Bruker AXS X8-APEX II with graphite-monochromated MoK $\alpha$  radiation. The data collection ( $2\theta_{\text{max}} = 56^\circ$ , distance detector = 60mm,  $\phi$  scan frames via  $0.7^\circ \phi$  rotation and 20 s per frame, range HKL : H -28,28 K -25,15 L -30,30) gave 75013 reflections. These led to 30297 independent reflections, for which 15086 had  $I > 2.0 \sigma(I)$ . The structure was solved with SIR-97,<sup>19</sup> which revealed the non hydrogen atoms of the molecule. After anisotropic refinement, many hydrogen atoms were found from the Fourier difference map. The whole structure was refined with SHELXL97<sup>20</sup> by the full-matrix least-square techniques (use of  $|F^2|$ ; x, y, z,  $\beta_{ij}$  for Pd, P, Cl, C and O atoms, x, y, z in riding mode for H atoms; 2127 variables and 15086 observations with  $I > 2.0 \sigma(I)$ ; calc  $w = 1/[\sigma^2(F_o^2) + (0.0642P)^2]$  where  $P = (F_o^2 + 2 F_c^2)/3$  with the resulting  $R = 0.0537$ ,  $R_w = 0.1189$  and  $S_w = 0.834$ ,  $\Delta\rho < 0.650\text{ e}\text{\AA}^{-3}$ . Flack parameter: 0.02 (2). The molecule crystallises

with three molecules of dichloromethane and one molecule of pentane. The full crystallographic data can be obtained free of charge from the Cambridge Crystallographic Data Centre via [www.ccdc.cam.ac.uk/data\\_request/cif](http://www.ccdc.cam.ac.uk/data_request/cif) by citing CCDC 292540.

**NMR data for monomer 1:**  $^1\text{H}$  NMR (300 MHz,  $\text{CDCl}_3$ ):  $\delta$  8.22 (d, 1H, *CH* arom,  $^3J = 8.9$  Hz), 8.13 (d, 1H, *CH* arom,  $^3J = 8.9$  Hz), 8.04 (d, 1H, *CH* arom,  $^3J = 8.2$  Hz), 7.97 (d, 1H, *CH* arom,  $^3J = 8.1$  Hz), 7.82-7.02 (m, 21H, *CH* arom and *m*-ArH), 7.00 (d, 1H, *m*-ArH,  $^4J = 2.1$  Hz), 6.74 (d, 1H, *m*-ArH,  $^4J = 2.2$  Hz), 6.70 (d, 1H, *m*-ArH,  $^4J = 2.2$  Hz), 6.50 (d, 1H, *m*-ArH,  $^4J = 2.4$  Hz), 6.42 (d, 1H, *m*-ArH,  $^4J = 2.0$  Hz), 6.37 (d, 1H, *m*-ArH,  $^4J = 2.2$  Hz), 6.31 (d, 1H, *m*-ArH,  $^4J = 2.1$  Hz), 5.16 and 3.57 (AB system, 2H,  $\text{ArCH}_2\text{Ar}$ ,  $^2J = 13.1$  Hz), 5.12 and 3.47 (AB system, 2H,  $\text{ArCH}_2\text{Ar}$ ,  $^2J = 13.2$  Hz), 5.06 and 3.10 (AB system, 2H,  $\text{ArCH}_2\text{Ar}$ ,  $^2J = 13.2$  Hz), 5.14-4.99 (m, 1H, central allyl), 4.93 and 3.00 (AB system, 2H,  $\text{ArCH}_2\text{Ar}$ ,  $^2J = 13.2$  Hz), 4.35-4.25 (m, 1H,  $\text{OCH}_2$ ), 4.25-4.14 (m, 1H,  $\text{OCH}_2$ ), 4.03-3.89 (m, 2H,  $\text{OCH}_2$ ), 2.79-2.56 (m, 2H, terminal allyl), 2.35-2.12 (m, 2H, terminal allyl), 2.12-1.82 (4H,  $\text{CH}_2\text{CH}_3$ ), 1.17-1.01 (6H,  $\text{CH}_2\text{CH}_3$ ), 1.14 (s, 9H,  $\text{C}(\text{CH}_3)_3$ ), 1.08 (s, 9H,  $\text{C}(\text{CH}_3)_3$ ), 0.81 (s, 9H,  $\text{C}(\text{CH}_3)_3$ ), 0.78 (s, 9H,  $\text{C}(\text{CH}_3)_3$ ).  $^{13}\text{C}\{^1\text{H}\}$  NMR (75 MHz,  $\text{CDCl}_3$ ):  $\delta$  151.43-119.88 (arom C and central allyl CH), 78.02 (s,  $\text{OCH}_2$ ), 77.87 (s,  $\text{OCH}_2$ ), 77.23 (s, terminal allyl  $\text{CH}_2$ ), 34.00 (s,  $\text{C}(\text{CH}_3)_3$ ), 33.93 (s,  $\text{C}(\text{CH}_3)_3$ ), 33.66 (s,  $\text{C}(\text{CH}_3)_3$ ), 33.61 (s,  $\text{C}(\text{CH}_3)_3$ ), 33.27 (s,  $\text{ArCH}_2\text{Ar}$ ), 33.19 (s,  $\text{ArCH}_2\text{Ar}$ ), 33.13 (s,  $\text{ArCH}_2\text{Ar}$ ), 33.06 (s,  $\text{ArCH}_2\text{Ar}$ ), 31.23 (s,  $\text{C}(\text{CH}_3)_3$ ), 31.17 (s,  $\text{C}(\text{CH}_3)_3$ ), 30.93 (s,  $\text{C}(\text{CH}_3)_3$ ), 24.15 (s,  $\text{CH}_2\text{CH}_3$ ), 23.47 (s,  $\text{CH}_2\text{CH}_3$ ), 10.07 (s,  $\text{CH}_2\text{CH}_3$ ), 10.01 (s,  $\text{CH}_2\text{CH}_3$ ).  $^{31}\text{P}\{^1\text{H}\}$  NMR (121 MHz,  $\text{CDCl}_3$ ):  $\delta$  128.51 and 126.36 (AB spin system,  $J_{\text{PP}'} = 107.7$  Hz,  $\text{OP}(\text{OAr})_2$ ), -144.38 (sept,  $J_{\text{PF}} = 712.8$  Hz,  $\text{PF}_6$ ).  $^{19}\text{F}\{^1\text{H}\}$  NMR (282 MHz,  $\text{CDCl}_3$ ):  $\delta$  -73.6 (d,  $J_{\text{FP}} = 713.0$  Hz,  $\text{PF}_6$ ). Found: C 65.09, H 5.51%. Calc. For  $\text{C}_{93}\text{H}_{95}\text{F}_6\text{O}_8\text{P}_3\text{Pd}\cdot 1\text{CH}_2\text{Cl}_2$  ( $M_r = 1654.08 + 84.93$ ): C 64.92, H 5.62%. MS (ESI TOF):  $m/z$  1507.57 [ $\text{M}^+$ , expected isotopic profile].
